# Supplementary material
Source: PubMed Central journal article supplement (PMC8092734)
Supplement: JCM.03163-20-s0001.pdf [file JCM.03163-20-s0001.pdf]

**TABLE S1.** Overview of results obtained with the reference method, FilmArray BCID2 panel, and FilmArray BCID panel for 90 blood cultures from patients with bloodstream infection<sup>a</sup>

| Blood culture ID | Organisms (with relative antimicrobial resistance genes) identified in blood cultures by:     |                                                                    |                                                        |
|------------------|-----------------------------------------------------------------------------------------------|--------------------------------------------------------------------|--------------------------------------------------------|
|                  | Reference method                                                                              | FilmArray BCID2 panel                                              | FilmArray BCID panel                                   |
|                  | Monomicrobial cultures (n = 55)                                                               |                                                                    |                                                        |
| 1                | <i>Bacteroides fragilis</i>                                                                   | <i>Bacteroides fragilis</i>                                        | None                                                   |
| 2                | <i>Bacteroides fragilis</i>                                                                   | <i>Bacteroides fragilis</i>                                        | None                                                   |
| 3                | <i>Bacteroides fragilis</i>                                                                   | <i>Bacteroides fragilis</i>                                        | None                                                   |
| 4                | <i>Bacteroides fragilis</i>                                                                   | <i>Bacteroides fragilis</i>                                        | None                                                   |
| 5                | <i>Bacteroides fragilis</i>                                                                   | <i>Bacteroides fragilis</i>                                        | None                                                   |
| 6                | <i>Bacteroides fragilis</i>                                                                   | <i>Bacteroides fragilis</i>                                        | None                                                   |
| 7                | <i>Citrobacter freundii</i> ( <i>bla</i> <sub>KPC-3</sub> )                                   | Enterobacterales (KPC)                                             | Enterobacteriaceae (KPC)                               |
| 8                | <i>Enterococcus faecalis</i>                                                                  | <i>Enterococcus faecalis</i>                                       | <i>Enterococcus</i>                                    |
| 9                | <i>Enterococcus faecalis</i> ( <i>vanA</i> )                                                  | <i>Enterococcus faecalis</i> ( <i>vanA/B</i> )                     | <i>Enterococcus</i> ( <i>vanA/B</i> )                  |
| 10               | <i>Enterococcus faecium</i>                                                                   | <i>Enterococcus faecium</i>                                        | <i>Enterococcus</i>                                    |
| 11               | <i>Enterococcus faecium</i>                                                                   | <i>Enterococcus faecium</i>                                        | <i>Enterococcus</i>                                    |
| 12               | <i>Escherichia coli</i> ( <i>bla</i> <sub>CTX-M-27</sub> )                                    | Enterobacterales, <i>Escherichia coli</i> (CTX-M)                  | Enterobacteriaceae, <i>Escherichia coli</i>            |
| 13               | <i>Escherichia coli</i> ( <i>bla</i> <sub>CTX-M-27</sub> )                                    | Enterobacterales, <i>Escherichia coli</i> (CTX-M)                  | Enterobacteriaceae, <i>Escherichia coli</i>            |
| 14               | <i>Escherichia coli</i> ( <i>bla</i> <sub>CTX-M-27</sub> )                                    | Enterobacterales, <i>Escherichia coli</i> (CTX-M)                  | Enterobacteriaceae, <i>Escherichia coli</i>            |
| 15               | <i>Escherichia coli</i> ( <i>bla</i> <sub>CTX-M-27</sub> )                                    | Enterobacterales, <i>Escherichia coli</i> (CTX-M)                  | Enterobacteriaceae, <i>Escherichia coli</i>            |
| 16               | <i>Escherichia coli</i> ( <i>bla</i> <sub>CTX-M-27</sub> )                                    | Enterobacterales, <i>Escherichia coli</i> (CTX-M)                  | Enterobacteriaceae, <i>Escherichia coli</i>            |
| 17               | <i>Escherichia coli</i> ( <i>bla</i> <sub>CTX-M-15</sub> )                                    | Enterobacterales, <i>Escherichia coli</i> (CTX-M)                  | Enterobacteriaceae, <i>Escherichia coli</i>            |
| 18               | <i>Escherichia coli</i> ( <i>bla</i> <sub>OXA-48</sub> )                                      | Enterobacterales, <i>Escherichia coli</i> (OXA-48-like)            | Enterobacteriaceae, <i>Escherichia coli</i>            |
| 19               | <i>Escherichia coli</i> ( <i>bla</i> <sub>VIM-1</sub> )                                       | Enterobacterales, <i>Escherichia coli</i> (VIM)                    | Enterobacteriaceae, <i>Escherichia coli</i>            |
| 20               | <i>Escherichia coli</i> ( <i>bla</i> <sub>VIM-1</sub> )                                       | Enterobacterales, <i>Escherichia coli</i> (VIM)                    | Enterobacteriaceae, <i>Escherichia coli</i>            |
| 21               | <i>Klebsiella aerogenes</i>                                                                   | Enterobacterales, <i>Klebsiella aerogenes</i>                      | Enterobacteriaceae                                     |
| 22               | <i>Klebsiella aerogenes</i>                                                                   | Enterobacterales, <i>Klebsiella aerogenes</i>                      | Enterobacteriaceae                                     |
| 23               | <i>Klebsiella aerogenes</i>                                                                   | Enterobacterales, <i>Klebsiella aerogenes</i>                      | Enterobacteriaceae                                     |
| 24               | <i>Klebsiella aerogenes</i>                                                                   | Enterobacterales, <i>Klebsiella aerogenes</i>                      | Enterobacteriaceae                                     |
| 25               | <i>Klebsiella aerogenes</i>                                                                   | Enterobacterales, <i>Klebsiella aerogenes</i>                      | Enterobacteriaceae                                     |
| 26               | <i>Klebsiella aerogenes</i> ( <i>bla</i> <sub>KPC-3</sub> )                                   | Enterobacterales, <i>Klebsiella aerogenes</i> (KPC)                | Enterobacteriaceae (KPC)                               |
| 27               | <i>Klebsiella oxytoca</i> ( <i>bla</i> <sub>CTX-M-15</sub> )                                  | Enterobacterales, <i>Klebsiella oxytoca</i> (CTX-M)                | Enterobacteriaceae, <i>Klebsiella oxytoca</i>          |
| 28               | <i>Klebsiella pneumoniae</i> ( <i>bla</i> <sub>CTX-M-15</sub> )                               | Enterobacterales, <i>Klebsiella pneumoniae</i> group (CTX-M)       | Enterobacteriaceae, <i>Klebsiella pneumoniae</i>       |
| 29               | <i>Klebsiella pneumoniae</i> ( <i>bla</i> <sub>CTX-M-15</sub> )                               | Enterobacterales, <i>Klebsiella pneumoniae</i> group (CTX-M)       | Enterobacteriaceae, <i>Klebsiella pneumoniae</i>       |
| 30               | <i>Klebsiella pneumoniae</i> ( <i>bla</i> <sub>KPC-31</sub> )                                 | Enterobacterales, <i>Klebsiella pneumoniae</i> group (KPC)         | Enterobacteriaceae, <i>Klebsiella pneumoniae</i> (KPC) |
| 31               | <i>Klebsiella pneumoniae</i> ( <i>bla</i> <sub>KPC-31</sub> )                                 | Enterobacterales, <i>Klebsiella pneumoniae</i> group (KPC)         | Enterobacteriaceae, <i>Klebsiella pneumoniae</i> (KPC) |
| 32               | <i>Klebsiella pneumoniae</i> ( <i>bla</i> <sub>KPC-3</sub> )                                  | Enterobacterales, <i>Klebsiella pneumoniae</i> group (KPC)         | Enterobacteriaceae, <i>Klebsiella pneumoniae</i> (KPC) |
| 33               | <i>Klebsiella pneumoniae</i> ( <i>bla</i> <sub>CTX-M-15</sub> + <i>bla</i> <sub>KPC-3</sub> ) | Enterobacterales, <i>Klebsiella pneumoniae</i> group (CTX-M + KPC) | Enterobacteriaceae, <i>Klebsiella pneumoniae</i> (KPC) |
| 34               | <i>Klebsiella pneumoniae</i> ( <i>bla</i> <sub>CTX-M-15</sub> + <i>bla</i> <sub>KPC-3</sub> ) | Enterobacterales, <i>Klebsiella pneumoniae</i> group (CTX-M + KPC) | Enterobacteriaceae, <i>Klebsiella pneumoniae</i> (KPC) |
| 35               | <i>Klebsiella pneumoniae</i> ( <i>bla</i> <sub>CTX-M-15</sub> + <i>bla</i> <sub>KPC-3</sub> ) | Enterobacterales, <i>Klebsiella pneumoniae</i> group (CTX-M + KPC) | Enterobacteriaceae, <i>Klebsiella pneumoniae</i> (KPC) |
| 36               | <i>Klebsiella pneumoniae</i> ( <i>bla</i> <sub>NDM-1</sub> )                                  | Enterobacterales, <i>Klebsiella pneumoniae</i> group (NDM)         | Enterobacteriaceae, <i>Klebsiella pneumoniae</i>       |
| 37               | <i>Klebsiella pneumoniae</i> ( <i>bla</i> <sub>OXA-48</sub> )                                 | Enterobacterales, <i>Klebsiella pneumoniae</i> group (OXA-48-like) | Enterobacteriaceae, <i>Klebsiella pneumoniae</i>       |
| 38               | <i>Klebsiella variicola</i>                                                                   | Enterobacterales, <i>Klebsiella pneumoniae</i> group               | Enterobacteriaceae, <i>Klebsiella pneumoniae</i>       |
| 39               | <i>Klebsiella variicola</i>                                                                   | Enterobacterales, <i>Klebsiella pneumoniae</i> group               | Enterobacteriaceae, <i>Klebsiella pneumoniae</i>       |
| 40               | <i>Klebsiella variicola</i>                                                                   | Enterobacterales, <i>Klebsiella pneumoniae</i> group               | Enterobacteriaceae, <i>Klebsiella pneumoniae</i>       |
| 41               | <i>Klebsiella variicola</i>                                                                   | Enterobacterales, <i>Klebsiella pneumoniae</i> group               | Enterobacteriaceae, <i>Klebsiella pneumoniae</i>       |
| 42               | <i>Klebsiella variicola</i>                                                                   | Enterobacterales, <i>Klebsiella pneumoniae</i> group               | Enterobacteriaceae, <i>Klebsiella pneumoniae</i>       |
| 43               | <i>Salmonella</i> sp.                                                                         | Enterobacterales, <i>Salmonella</i>                                | Enterobacteriaceae                                     |

|    |                                                                                                                                                      |                                                                                                                                                                               |                                                                                                                                                      |
|----|------------------------------------------------------------------------------------------------------------------------------------------------------|-------------------------------------------------------------------------------------------------------------------------------------------------------------------------------|------------------------------------------------------------------------------------------------------------------------------------------------------|
| 44 | <i>Salmonella</i> sp.                                                                                                                                | Enterobacterales, <i>Salmonella</i>                                                                                                                                           | Enterobacteriaceae                                                                                                                                   |
| 45 | <i>Salmonella</i> sp.                                                                                                                                | Enterobacterales, <i>Salmonella</i>                                                                                                                                           | Enterobacteriaceae                                                                                                                                   |
| 46 | <i>Salmonella</i> sp.                                                                                                                                | Enterobacterales, <i>Salmonella</i>                                                                                                                                           | Enterobacteriaceae                                                                                                                                   |
| 47 | <i>Salmonella</i> sp. ( <i>bla</i> <sub>CTX-M-15</sub> )                                                                                             | Enterobacterales, <i>Salmonella</i> (CTX-M)                                                                                                                                   | Enterobacteriaceae                                                                                                                                   |
| 48 | <i>Stenotrophomonas maltophilia</i>                                                                                                                  | <i>Stenotrophomonas maltophilia</i>                                                                                                                                           | None                                                                                                                                                 |
| 49 | <i>Stenotrophomonas maltophilia</i>                                                                                                                  | <i>Stenotrophomonas maltophilia</i>                                                                                                                                           | None                                                                                                                                                 |
| 50 | <i>Stenotrophomonas maltophilia</i>                                                                                                                  | <i>Stenotrophomonas maltophilia</i>                                                                                                                                           | None                                                                                                                                                 |
| 51 | <i>Staphylococcus lugdunensis</i>                                                                                                                    | <i>Staphylococcus</i> , <i>Staphylococcus lugdunensis</i>                                                                                                                     | <i>Staphylococcus</i>                                                                                                                                |
| 52 | <i>Staphylococcus lugdunensis</i>                                                                                                                    | <i>Staphylococcus</i> , <i>Staphylococcus lugdunensis</i>                                                                                                                     | <i>Staphylococcus</i>                                                                                                                                |
| 53 | <i>Staphylococcus lugdunensis</i>                                                                                                                    | <i>Staphylococcus</i> , <i>Staphylococcus lugdunensis</i>                                                                                                                     | <i>Staphylococcus</i>                                                                                                                                |
| 54 | <i>Staphylococcus haemolyticus</i> ( <i>mecA</i> )                                                                                                   | <i>Staphylococcus</i>                                                                                                                                                         | <i>Staphylococcus</i> ( <i>mecA</i> )                                                                                                                |
| 55 | <i>Staphylococcus epidermidis</i>                                                                                                                    | <i>Staphylococcus</i> , <i>Staphylococcus epidermidis</i>                                                                                                                     | <i>Staphylococcus</i>                                                                                                                                |
|    | Polymicrobial cultures ( <i>n</i> = 35)                                                                                                              |                                                                                                                                                                               |                                                                                                                                                      |
| 56 | <i>Acinetobacter baumannii</i> ( <i>bla</i> <sub>OXA-23</sub> ) + <i>Klebsiella aerogenes</i>                                                        | <i>Acinetobacter calcoaceticus</i> - <i>Acinetobacter baumannii</i> complex + Enterobacterales, <i>Klebsiella aerogenes</i>                                                   | <i>Acinetobacter baumannii</i> + Enterobacteriaceae                                                                                                  |
| 57 | <i>Acinetobacter baumannii</i> ( <i>bla</i> <sub>OXA-23</sub> ) + <i>Staphylococcus haemolyticus</i>                                                 | <i>Acinetobacter calcoaceticus</i> - <i>Acinetobacter baumannii</i> complex + <i>Staphylococcus</i>                                                                           | <i>Acinetobacter baumannii</i> + <i>Staphylococcus</i>                                                                                               |
| 58 | <i>Acinetobacter baumannii</i> + <i>Enterococcus faecium</i>                                                                                         | <i>Acinetobacter calcoaceticus</i> - <i>Acinetobacter baumannii</i> complex + <i>Enterococcus faecium</i>                                                                     | <i>Acinetobacter baumannii</i> + <i>Enterococcus</i>                                                                                                 |
| 59 | <i>Bacteroides fragilis</i> + <i>Enterococcus faecium</i> ( <i>vanA</i> ) + <i>Escherichia coli</i> ( <i>bla</i> <sub>NDM-1</sub> )                  | <i>Bacteroides fragilis</i> + <i>Enterococcus faecium</i> ( <i>vanA/B</i> ) + Enterobacterales, <i>Escherichia coli</i> (NDM)                                                 | <i>Enterococcus</i> ( <i>vanA/B</i> ) + Enterobacteriaceae, <i>Escherichia coli</i>                                                                  |
| 60 | <i>Bacteroides fragilis</i> + <i>Klebsiella pneumoniae</i> ( <i>bla</i> <sub>VIM-1</sub> ) + <i>Klebsiella variicola</i>                             | <i>Bacteroides fragilis</i> + Enterobacterales, <i>Klebsiella pneumoniae</i> group (VIM)                                                                                      | Enterobacteriaceae, <i>Klebsiella pneumoniae</i>                                                                                                     |
| 61 | <i>Brevibacterium casei</i> + <i>Stenotrophomonas maltophilia</i>                                                                                    | <i>Stenotrophomonas maltophilia</i>                                                                                                                                           | None                                                                                                                                                 |
| 62 | <i>Enterobacter cloacae</i> complex + <i>Stenotrophomonas maltophilia</i> + <i>Streptococcus salivarius</i>                                          | Enterobacterales, <i>Enterobacter cloacae</i> complex + <i>Stenotrophomonas maltophilia</i> + <i>Streptococcus</i>                                                            | Enterobacteriaceae, <i>Enterobacter cloacae</i> complex + <i>Streptococcus</i>                                                                       |
| 63 | <i>Enterobacter cloacae</i> complex ( <i>bla</i> <sub>CTX-M-15</sub> ) + <i>Enterococcus faecalis</i> + <i>Staphylococcus aureus</i> ( <i>mecA</i> ) | Enterobacterales, <i>Enterobacter cloacae</i> complex (CTX-M) + <i>Enterococcus faecalis</i> + <i>Staphylococcus</i> , <i>Staphylococcus aureus</i> ( <i>mecA/C</i> and MREJ) | Enterobacteriaceae, <i>Enterobacter cloacae</i> complex + <i>Enterococcus</i> + <i>Staphylococcus</i> , <i>Staphylococcus aureus</i> ( <i>mecA</i> ) |
| 64 | <i>Enterococcus faecalis</i> + <i>Candida albicans</i>                                                                                               | <i>Enterococcus faecalis</i> + <i>Candida albicans</i>                                                                                                                        | <i>Enterococcus</i> + <i>Candida albicans</i>                                                                                                        |
| 65 | <i>Enterococcus faecalis</i> + <i>Stenotrophomonas maltophilia</i>                                                                                   | <i>Enterococcus faecalis</i> + <i>Stenotrophomonas maltophilia</i>                                                                                                            | <i>Enterococcus</i>                                                                                                                                  |
| 66 | <i>Enterococcus faecalis</i> + <i>Enterococcus faecium</i> ( <i>vanA</i> )                                                                           | <i>Enterococcus faecalis</i> + <i>Enterococcus faecium</i> ( <i>vanA/B</i> )                                                                                                  | <i>Enterococcus</i> ( <i>vanA/B</i> )                                                                                                                |
| 67 | <i>Enterococcus faecalis</i> + <i>Pseudomonas aeruginosa</i>                                                                                         | <i>Enterococcus faecalis</i> + <i>Pseudomonas aeruginosa</i>                                                                                                                  | <i>Enterococcus</i> + <i>Pseudomonas aeruginosa</i>                                                                                                  |
| 68 | <i>Enterococcus faecalis</i> + <i>Staphylococcus epidermidis</i>                                                                                     | <i>Enterococcus faecalis</i> + <i>Staphylococcus</i> , <i>Staphylococcus epidermidis</i>                                                                                      | <i>Enterococcus</i> + <i>Staphylococcus</i>                                                                                                          |
| 69 | <i>Enterococcus faecalis</i> + <i>Staphylococcus epidermidis</i> ( <i>mecA</i> )                                                                     | <i>Enterococcus faecalis</i> + <i>Staphylococcus</i> , <i>Staphylococcus epidermidis</i> ( <i>mecA/C</i> )                                                                    | <i>Enterococcus</i> + <i>Staphylococcus</i> ( <i>mecA</i> )                                                                                          |
| 70 | <i>Enterococcus faecium</i> + <i>Klebsiella aerogenes</i>                                                                                            | Enterobacterales, <i>Klebsiella aerogenes</i> + <i>Enterococcus faecium</i>                                                                                                   | Enterobacteriaceae + <i>Enterococcus</i>                                                                                                             |
| 71 | <i>Enterococcus faecium</i> ( <i>vanA</i> ) + <i>Salmonella</i> sp.                                                                                  | <i>Enterococcus faecium</i> ( <i>vanA/B</i> ) + Enterobacterales, <i>Salmonella</i>                                                                                           | Enterobacteriaceae + <i>Enterococcus</i> ( <i>vanA/B</i> )                                                                                           |
| 72 | <i>Enterococcus faecium</i> + <i>Staphylococcus aureus</i>                                                                                           | <i>Enterococcus faecium</i> + <i>Staphylococcus</i> , <i>Staphylococcus aureus</i>                                                                                            | <i>Enterococcus</i> + <i>Staphylococcus</i> , <i>Staphylococcus aureus</i>                                                                           |
| 73 | <i>Escherichia coli</i> ( <i>bla</i> <sub>NDM-1</sub> ) + <i>Klebsiella aerogenes</i> + <i>Staphylococcus lugdunensis</i>                            | Enterobacterales, <i>Escherichia coli</i> (NDM) + <i>Klebsiella aerogenes</i> + <i>Staphylococcus</i> , <i>Staphylococcus lugdunensis</i>                                     | Enterobacteriaceae, <i>Escherichia coli</i> + <i>Staphylococcus</i>                                                                                  |
| 74 | <i>Klebsiella oxytoca</i> + <i>Staphylococcus epidermidis</i> ( <i>mecA</i> )                                                                        | Enterobacterales, <i>Klebsiella oxytoca</i> + <i>Staphylococcus</i> , <i>Staphylococcus epidermidis</i> ( <i>mecA/C</i> )                                                     | Enterobacteriaceae, <i>Klebsiella oxytoca</i> + <i>Staphylococcus</i> ( <i>mecA</i> )                                                                |
| 75 | <i>Klebsiella oxytoca</i> + <i>Staphylococcus lugdunensis</i>                                                                                        | Enterobacterales, <i>Klebsiella oxytoca</i> + <i>Staphylococcus</i> , <i>Staphylococcus lugdunensis</i>                                                                       | Enterobacteriaceae, <i>Klebsiella oxytoca</i> + <i>Staphylococcus</i>                                                                                |
| 76 | <i>Klebsiella pneumoniae</i> ( <i>bla</i> <sub>CTX-M-15</sub> + <i>bla</i> <sub>OXA-48</sub> ) + <i>Staphylococcus pettenkoferi</i>                  | Enterobacterales, <i>Klebsiella pneumoniae</i> group (CTX-M + OXA-48-like) + <i>Staphylococcus</i>                                                                            | Enterobacteriaceae, <i>Klebsiella pneumoniae</i> + <i>Staphylococcus</i>                                                                             |

|    |                                                                                                                  |                                                                                                                                      |                                                                             |
|----|------------------------------------------------------------------------------------------------------------------|--------------------------------------------------------------------------------------------------------------------------------------|-----------------------------------------------------------------------------|
| 77 | <i>Klebsiella pneumoniae</i> (bla <sub>CTX-M-15</sub> + bla <sub>VIM-1</sub> ) + <i>Staphylococcus pasteurii</i> | Enterobacterales, <i>Klebsiella pneumoniae</i> group (CTX-M + VIM) + <i>Staphylococcus</i>                                           | Enterobacteriaceae, <i>Klebsiella pneumoniae</i> + <i>Staphylococcus</i>    |
| 78 | <i>Klebsiella pneumoniae</i> (bla <sub>OXA-48</sub> ) + <i>Klebsiella variicola</i>                              | Enterobacterales, <i>Klebsiella pneumoniae</i> group (OXA-48-like)                                                                   | Enterobacteriaceae, <i>Klebsiella pneumoniae</i>                            |
| 79 | <i>Klebsiella variicola</i> + <i>Staphylococcus lugdunensis</i>                                                  | Enterobacterales, <i>Klebsiella pneumoniae</i> group + <i>Staphylococcus</i> ,<br><i>Staphylococcus lugdunensis</i>                  | Enterobacteriaceae, <i>Klebsiella pneumoniae</i> +<br><i>Staphylococcus</i> |
| 80 | <i>Ochrobactrum anthropi</i> + <i>Stenotrophomonas maltophilia</i>                                               | <i>Stenotrophomonas maltophilia</i>                                                                                                  | None                                                                        |
| 81 | <i>Salmonella</i> sp.+ <i>Staphylococcus epidermidis</i> + <i>Staphylococcus lugdunensis</i>                     | Enterobacterales, <i>Salmonella</i> + <i>Staphylococcus</i> , <i>Staphylococcus epidermidis</i> + <i>Staphylococcus lugdunensis</i>  | Enterobacteriaceae + <i>Staphylococcus</i>                                  |
| 82 | <i>Salmonella</i> sp. + <i>Staphylococcus lugdunensis</i>                                                        | Enterobacterales, <i>Salmonella</i> + <i>Staphylococcus</i> , <i>Staphylococcus lugdunensis</i>                                      | Enterobacteriaceae + <i>Staphylococcus</i>                                  |
| 83 | <i>Staphylococcus aureus</i> + <i>Staphylococcus haemolyticus</i> ( <i>mecA</i> )                                | <i>Staphylococcus aureus</i>                                                                                                         | <i>Staphylococcus (mecA)</i> , <i>Staphylococcus aureus</i>                 |
| 84 | <i>Staphylococcus aureus</i> ( <i>mecA</i> ) + <i>Staphylococcus epidermidis</i>                                 | <i>Staphylococcus (mecA/C)</i> , <i>Staphylococcus aureus</i> ( <i>mecA/C</i> and MREJ) + <i>Staphylococcus epidermidis</i>          | <i>Staphylococcus (mecA)</i> , <i>Staphylococcus aureus</i>                 |
| 85 | <i>Staphylococcus aureus</i> ( <i>mecA</i> ) + <i>Staphylococcus epidermidis</i>                                 | <i>Staphylococcus (mecA/C)</i> , <i>Staphylococcus aureus</i> ( <i>mecA/C</i> and MREJ) + <i>Staphylococcus epidermidis</i>          | <i>Staphylococcus (mecA)</i> , <i>Staphylococcus aureus</i>                 |
| 86 | <i>Staphylococcus aureus</i> ( <i>mecA</i> ) + <i>Staphylococcus epidermidis</i> ( <i>mecA</i> )                 | <i>Staphylococcus</i> , <i>Staphylococcus aureus</i> ( <i>mecA/C</i> and MREJ) + <i>Staphylococcus epidermidis</i> ( <i>mecA/C</i> ) | <i>Staphylococcus (mecA)</i> , <i>Staphylococcus aureus</i>                 |
| 87 | <i>Staphylococcus aureus</i> ( <i>mecA</i> ) + <i>Staphylococcus haemolyticus</i> ( <i>mecA</i> )                | <i>Staphylococcus</i> , <i>Staphylococcus aureus</i> ( <i>mecA/C</i> and MREJ)                                                       | <i>Staphylococcus (mecA)</i> , <i>Staphylococcus aureus</i>                 |
| 88 | <i>Staphylococcus aureus</i> + <i>Staphylococcus epidermidis</i>                                                 | <i>Staphylococcus</i> , <i>Staphylococcus aureus</i> + <i>Staphylococcus epidermidis</i>                                             | <i>Staphylococcus</i> , <i>Staphylococcus aureus</i>                        |
| 89 | <i>Staphylococcus aureus</i> + <i>Staphylococcus epidermidis</i> ( <i>mecA</i> )                                 | <i>Staphylococcus</i> , <i>Staphylococcus aureus</i> + <i>Staphylococcus epidermidis</i> ( <i>mecA/C</i> )                           | <i>Staphylococcus (mecA)</i> , <i>Staphylococcus aureus</i>                 |
| 90 | <i>Staphylococcus epidermidis</i> + <i>Staphylococcus lugdunensis</i> + <i>Stenotrophomonas maltophilia</i>      | <i>Staphylococcus</i> , <i>Staphylococcus epidermidis</i> + <i>Staphylococcus lugdunensis</i> + <i>Stenotrophomonas maltophilia</i>  | <i>Staphylococcus</i>                                                       |

Abbreviations. ID, identifier; BCID2, blood culture identification 2; BCID, blood culture identification, MREJ, *mec* right extremity junction.

\*The reference method consists of conventional culture-based (1) or PCR-sequencing (2–4) analyses performed on blood culture isolates for organism identification and antimicrobial resistance gene detection, respectively.

## REFERENCES

1. Fiori B, D'Inzeo T, Giaquinto A, Menchinelli G, Liotti FM, de Maio F, De Angelis G, Quaranta G, Nagel D, Tumbarello M, Posteraro B, Sanguinetti M, Spanu T. 2016. Optimized use of the MALDI BioTyper system and the FilmArray BCID panel for direct identification of microbial pathogens from positive blood cultures. *J Clin Microbiol* 54:576–584. <https://doi.org/10.1128/JCM.02590-15>.
2. Giani T, Antonelli A, Caltagirone M, Mauri C, Nicchi J, Arena F, Nucleo E, Bracco S, Pantosti A; AMCLI-CoSA survey participants, Luzzaro F, Pagani L, Rossolini GM. 2017. Evolving beta-lactamase epidemiology in *Enterobacteriaceae* from Italian nationwide surveillance, October 2013: KPC-carbapenemase spreading among outpatients. *Euro Surveill* 22:30583. <https://doi.org/10.2807/1560-7917.ES.2017.22.31.30583>.
3. Coppi M, Antonelli A, Giani T, Spanu T, Liotti FM, Fontana C, Mirandola W, Gargiulo R, Barozzi A, Mauri C, Principe L, Rossolini GM. Multicenter evaluation of the RAPIDEC® CARBA NP test for rapid screening of carbapenemase-producing *Enterobacteriaceae* and Gram-negative nonfermenters from clinical specimens. 2017. *Diagn Microbiol Infect Dis* 88:207–213. <https://doi.org/10.1016/j.diagmicrobio.2017.04.009>.
4. Liotti FM, Posteraro B, Mannu F, Carta F, Pantaleo A, De Angelis G, Menchinelli G, Spanu T, Fiori PL, Turrini F, Sanguinetti M. 2019. Development of a multiplex PCR platform for the rapid detection of bacteria, antibiotic resistance, and *Candida* in human blood samples. *Front Cell Infect Microbiol* 9:389. <https://doi.org/10.3389/fcimb.2019.00389>.
